# Supplementary material
Source: Springer Nature journal article supplement (https://www.springermedizin.de/resource/supplementary/12874_2012_943_MOESM1_ESM.pdf/9433210)

**A**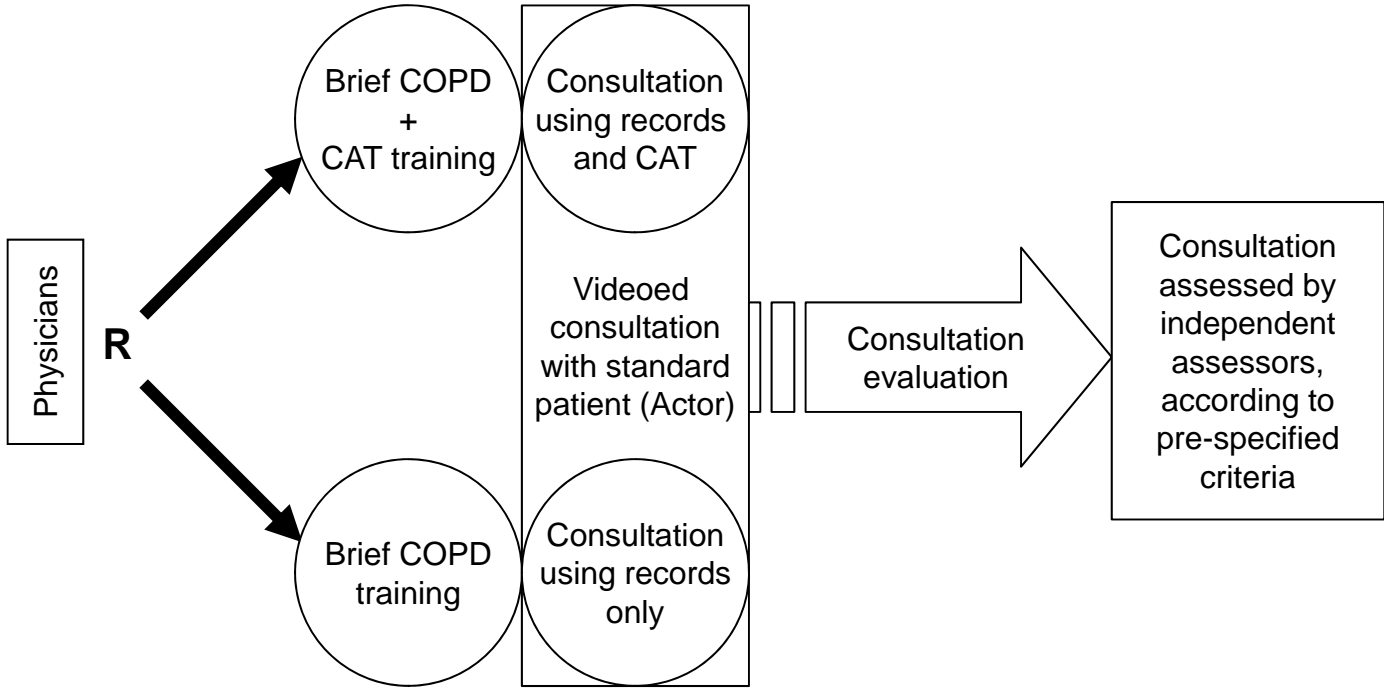**B**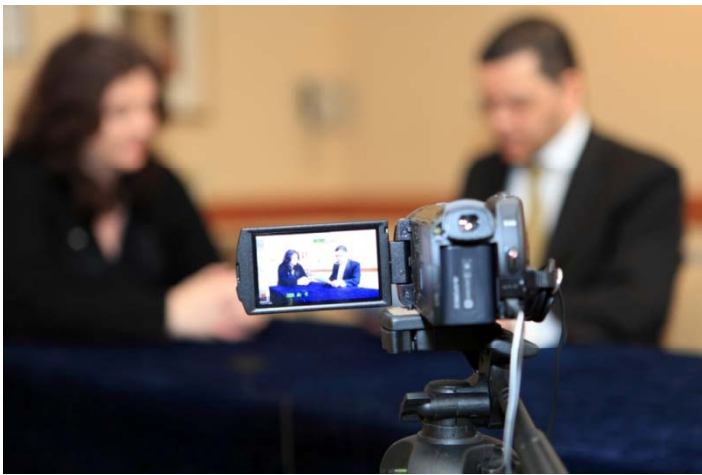

Supplement: MOESM1 [file 9433210]
